# Supplementary material
Source: PubMed Central journal article supplement (PMC3240684)
Supplement: NIHMS323673-supplement-Supp_Figure_S1-S4.pdf [file NIHMS323673-supplement-Supp_Figure_S1-S4.pdf]

## **SUPPORTING INFORMATION**

|  
Scripts and programs used in data analysis:

All computer codes are accessible through the following link:

[http://chakravarti.igm.jhmi.edu/AravindaChakravartiLab/GS\\_Junior.html](http://chakravarti.igm.jhmi.edu/AravindaChakravartiLab/GS_Junior.html)

### Supplementary Figure S1

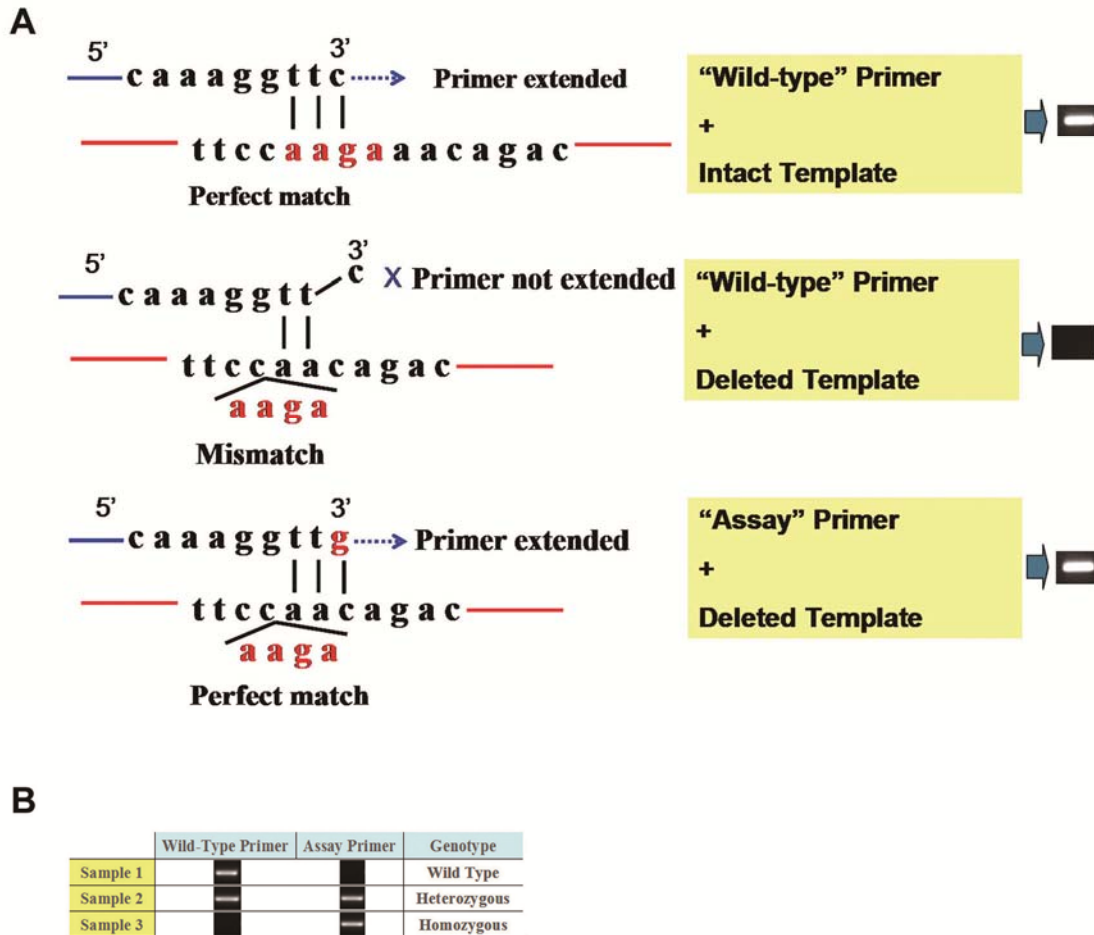

**Supp. Figure S1.** Allele-specific amplification and detection of PCR products. (A) Schematic representation of the allele-specific PCR method. Wild-type primer forms a perfect match at the 3' end with the intact template on the normal allele but a mismatch with the deleted template on the variant allele. Similarly, the assay primer forms a 3' end match with the deleted allele and 3' end mismatch with the wild type allele. (B) Allele-specific amplification genotypes of each sample after gel electrophoresis.

## Supplementary Figure S2

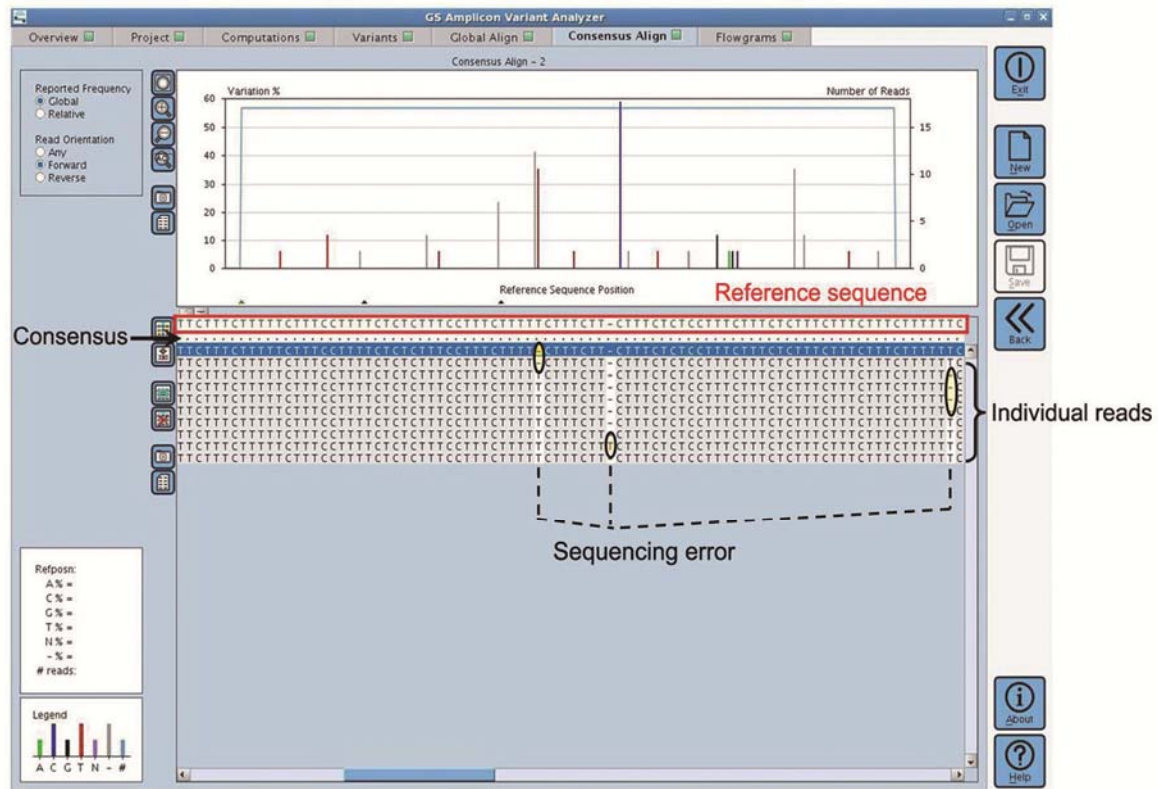

**Supp. Figure S2.** An example of sequence at a long homopolymeric  $(CT)_n$  region. A screenshot of one amplicon sequencing trace after alignment to the reference sequence is shown in the Amplicon Variant Analyzer (AVA). Ten individual reads are shown below with three sequencing errors; the reference sequence is in the first line followed by the consensus sequence.

## Supplementary Figure S3

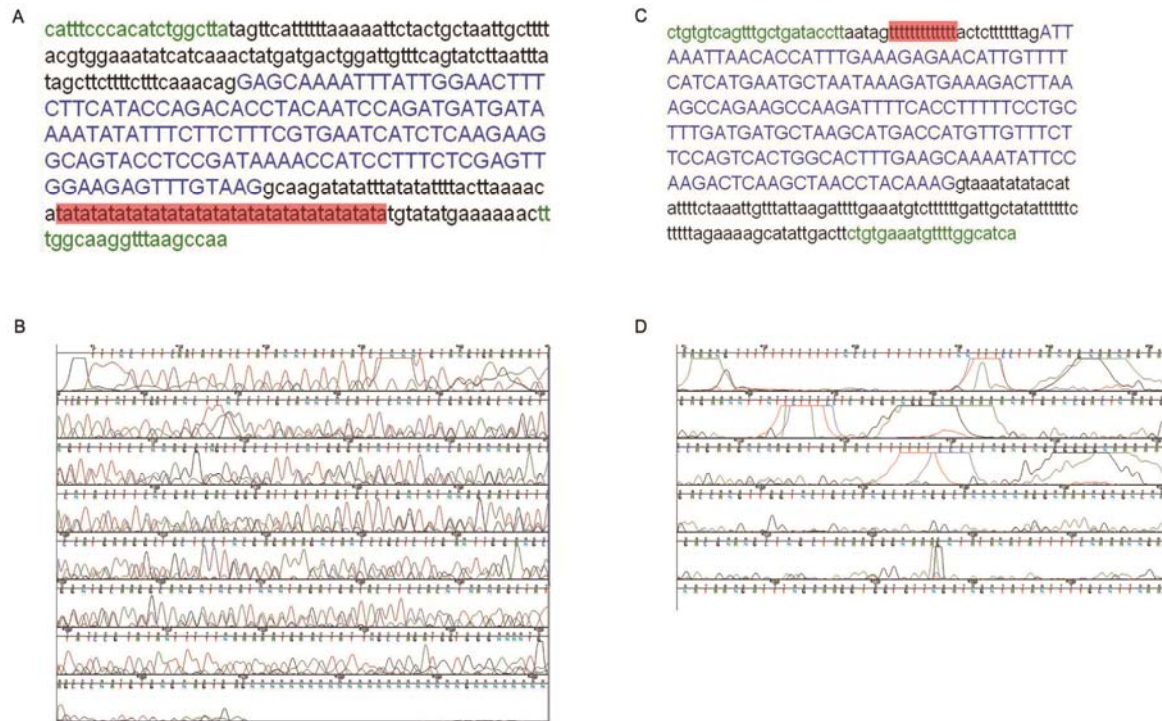

**Supp. Figure S3.** DNA sequence of two amplicons (A, C) and their corresponding Sanger-sequence chromatograms (B, D). Coding sequences are shown in upper case; PCR amplification and Sanger-sequencing primers are highlighted in green; an AT di-nucleotide repeat and a T homopolymer are shaded in red.

## Supplementary Figure S4

### SEMA3A

```
Human NP_006071.1 GLANSSSYHTFLLDEERSRLYVGAKDHIFSFDLVNI-KDFQKIVWVPSYT 98  
Chimp_XP_001160811.1 GLANSSSYHTFLLDEERSRLYVGAKDHIFSFDLVNI-KDFQKIVWVPSYT 98  
Mouse NP_033178.2 GLANSSSYHTFLLDEERSRLYVGAKDHIFSFNLVNI-KDFQKIVWVPSYT 98  
Rat NP_059006.1 GLANSSSYHTFLLDEERSRLYVGAKDHIFSFNLVNI-KDFQKIVWVPSYT 98  
Dog_XP_849675.1 GLANSSSYHTFLLDEERSRLYVGAKDHIFSFNLVNI-KDFQKIVWVPSYT 98  
Cow_XP_002686782.1 GLANSSSYHTFLLDEERSRLYVGAKDHIFSFNLVNI-KDFQKIVWVPSYT 98  
Chicken NP_990308.1 GLANSSSYHTFLLDEERSRLYVGAKDHIFSFNLVNI-KEYQKIVWVPSHS 98  
Zebrafish NP_571136.1 GLANSSAYHTFLLDEERGRLLVFGAKDHLVLSFNLDVINDMQQLISWPSSPS 100  
*****:*****:*:*****:***:*:* : * * * * * :
```

↳ S54G

```
Human NP_006071.1 VITFARSHPAMYNPVFPMNRPVIVIKTDVNYQFTQIVVDRVDAEDGGQYDV 448  
Chimp_XP_001160811.1 VITFARSHPAMYNPVFPMNRPVIVIKTDVNYQFTQIVVDRVDAEDGGQYDV 448  
Mouse NP_033178.2 VITFARSHPAMYNPVFPIINRPIIMIKTDVNYQFTQIVVDRVDAEDGGQYDV 448  
Rat NP_059006.1 VITFARSHPAMYNPVFPIINRPIIMIKTDVNYQFTQIVVDRVDAEDGGQYDV 448  
Dog_XP_849675.1 VITFARSHPAMYNPVFPIINRPIIMIKTDVNYQFTQIVVDRVDAEDGGQYDV 448  
Cow_XP_002686782.1 VITFARSHPAMYNPVFPIINRPIIMIKTDVNYQFTQIVVDRVDAEDGGQYDV 448  
Chicken NP_990308.1 VITFARSHPAMYNPVFPIINRPIIMIKTDVNYQFTQIVVDRVDAEDGGQYDV 448  
Zebrafish NP_571136.1 VITFARSHPAMYNPVFPIINHPPIIKTDVDYQFTQIVVDRVDAEDGGQYDV 449  
*****:*****:*:*****:*****:*****:
```

↳ V435I

### SEMA3C

```
Human NP_006370.1 EDGPETHFDELEDVFLLETDPNRTTLVYGIFFTSSSVFKGSAVCVYHLSD 344  
Chimp_XP_527801.2 EDGPETHFDELEDVFLLETDPNRTTLVYGIFFTSSSVFKGSAVCVYHLSD 344  
Mouse NP_038685.3 EDGPETHFDELEDVFLLETDPNRTTLVYGIFFTSSSVFKGSAVCVYHLSD 344  
Rat NP_001100048.1 EDGPETHFDELEDVFLLETDPNRTTLVYGIFFTSSSVFKGSAVCVYHLSD 344  
Dog_XP_533139.2 EDGPETHFDELEDVFLLETDPNRTTLVYGIFFTSSSVFKGSAVCVYHLSD 344  
Cow NP_001094552.1 EDGPETHFDELEDVFLLEMDNPRRTLAVYGIFFTSSSVFKGSAVCVYHFS 344  
Chicken NP_989574.1 EDGTETYFDELEDVFLLETDPNRTTLVYGIFFTSSSVFKGSAVCVYHLSD 344  
Zebrafish_XP_692847.2 EDGTETHFDELENVFLLETDPHFKGLLIFGVFTSTSSVFRGSAVCVYHMD 400  
***:*:*****:***** *:*: *:*:*:*:*:*:*:*:***:***:***:
```

↳ V337M

### SEMA3D

```
Human NP_689967.2 LTYKDLLLSNSCIPFLGSEGLDFQTLTLLDEERGRLLLGAKDHIFLLSLV 96  
Chimp_XP_527805.2 LTYKDLLLSNSCIPFLGSEGLDFQTLTLLDEERGRLLLGAKDHIFLLSLV 96  
Mouse NP_083158.3 LTYKDLLLSNTCIPFLGSEGLDFQTLTLLDEERGIILLGAKDHVFLSLV 96  
Rat NP_001098103.1 LTYKDLLLSNTCIPFLGSEGLDFQTLTLLDEERGIILLGAKDHVFLNLV 96  
Dog_XP_533138.2 LTYKDLLLSNSCIPFLGSEGLDFQTLTLLDEERGRLLVVGAKDHIFLLSLV 96  
Cow_XP_616548.3 LTYKDLLLSNSCIPFLGSEGLDFQTLTLLDEERGRLLLGAKDHIFLLSLV 96  
Chicken NP_990704.1 LSYKDLLLSNSCIPFLGSEGLDFRTLLTLLDEERGRLLVVGAKDHIFLLNLV 84  
Zebrafish NP_571123.1 LGYKDLIHSRVSVPFTGSEGHQFTVLLDEERSRLLLGAKDHVYLLDPD 100  
* * * * * : * . : ** * * . * * . : * : * * * * * . * : * * * * * : * *
```

↳ S65P

```
Human NP_689967.2 DEKVIFGIEFNSTFLECI PKSQQATIKWYIQRSGDEHREELKPDERI IKT 646  
Chimp_XP_527805.2 DEKVIFGIEFNSTFLECI PKSQQATIKWYIQRSGDEHREELKPDERI IKT 646  
Mouse NP_083158.3 DEKVIFGIEFNSTFLECI PKSQQASVEWYIQRSGDEHREELKPDERI IKT 646  
Rat NP_001098103.1 DEKVIFGIEFNSTFLECI PKSQQASVEWYIQRSGDEHREELKPDERI IKT 646  
Dog_XP_533138.2 DEKVIFGIEFNSTFLECI PKSQQASIKWYIQRSGDEHREELKPDERI IKT 646  
Cow_XP_616548.3 DEKVIFGIEFNSTFLECI PKSQQASVIRWYIQRSGDEHREELKPDERI IKT 645  
Chicken NP_990704.1 DEKVIFGIEFNSTFLECI PKSQQASIRWYIQRSGEHEHREELKADERI IKT 634  
Zebrafish NP_571123.1 EEKVLVGVESNSSFLECVSKSQQALIRWFLKPGVDHRQEIKPDERVIT 649  
:***:*:* * * : * * * * * : * * * * * : * * * * * : * *
```

↳ P615T

```
Human NP_689967.2 HEEGVVKDLLAESRLRYKDYIQLSSPNFSLDQYCEQMWHEKRRQRNKG 746  
Chimp_XP_527805.2 HEEGVVKDLLAESRLRYKDYIQLSSPNFSLDQYCEQMWHEKRRQRNKG 746  
Mouse NP_083158.3 YQEGQVKDLLAESRLRYKDYIQLSSPNFSLDQYCEQMWWYKRRQRNKG 746  
Rat NP_001098103.1 YQEGQVKDLLAESRLRYKDYIQLSSPNFSLDQYCEQMWWYKRRQRNKG 746  
Dog_XP_533138.2 HEEGVVKDLLAESRLRYKDYIQLSSPNFSLDQYCEQMWHEKRRQRNKG 746  
Cow_XP_616548.3 HEEGVVKDLLAESRLRYKDYIQLSSPNFSLDQYCEQMWHEKRRQRNKG 745  
Chicken NP_990704.1 DEEGRVLDLLESRLRYKDYIQLVSSPSFSLDEYCEQMWHEKRRQRNKG 734  
Zebrafish NP_571123.1 R-ESSENPAVTEPRQRYKDYLRMLSGPARSLDEYCEQMWHEK- QKQKG 747  
* . . : * . * * * * * : * * * * * * * * * * * : * * * * *
```

↳ K701Q

**Supp. Figure S4.** Protein sequence alignment of SEMA3A, SEMA3C and SEMA3D in human, chimp, mouse, rat, dog, cow, chicken and zebrafish. The position of each missense variant identified in HSCR cases is shown; asterisks denote completely conserved sites while dots indicate conservative substitutions.
